# Supplementary material
Source: publisher figshare collection journal article supplement (https://karger.figshare.com/articles/dataset/_/4622086)
Supplement: Supplementary file 1 [file 1]

**Table 4. Anatomical predilection sites and symptoms. (supplementary data)**

| <b>Anatomical site</b> | <b>Sarcoidosis</b> |          | <b>Non-sarcoidosis</b> |          |
|------------------------|--------------------|----------|------------------------|----------|
|                        | <b>Number</b>      | <b>%</b> | <b>Number</b>          | <b>%</b> |
| Shoulders/Upper arm    | 8                  | 30       | 20                     | 31       |
| Forearm                | 6                  | 22       | 14                     | 22       |
| Wrist/hand             | 4                  | 15       | 4                      | 6        |
| Lower leg              | 2                  | 7        | 5                      | 8        |
| Foot, ankle            | 0                  | 0        | 0                      | 0        |
| Trunk, posterior       | 2                  | 7        | 4                      | 6        |
| Trunk, anterior        | 0                  | 0        | 5                      | 8        |
| Neck                   | 0                  | 0        | 2                      | 3        |
| Sacral region          | 1                  | 4        | 4                      | 6        |
| Eyebrows/eyelids       | 0                  | 0        | 1                      | 2        |
| Flank                  | 1                  | 4        | 0                      | 0        |
| Lips                   | 0                  | 0        | 1                      | 2        |
| Multiple sites         | 3                  | 11       | 5                      | 9        |

| <b>Debut of symptom</b> | <b>Number</b> | <b>%</b> | <b>Number</b> | <b>%</b> |
|-------------------------|---------------|----------|---------------|----------|
| Instantaneously         | 0             | 0        | 0             | 0        |
| 1-7 days                | 0             | 0        | 4             | 6        |
| 8-25 days               | 2             | 7        | 10            | 15       |
| 1-3 months              | 3             | 11       | 5             | 8        |
| >3-6 months             | 0             | 0        | 7             | 11       |
| >6-12 months            | 2             | 7        | 4             | 6        |
| >12-24 months           | 2             | 7        | 6             | 9        |
| >24-48 months           | 4             | 15       | 13            | 20       |
| > 48 months             | 13            | 48       | 16            | 25       |
| Not known               | 1             | 4        | 0             | 0        |

| <b>Symptoms according to patient's history</b> | <b>Number</b> | <b>%</b> | <b>Number</b> | <b>%</b> |
|------------------------------------------------|---------------|----------|---------------|----------|
| Swelling                                       | 22            | 81       | 60            | 92       |
| Itch                                           | 15            | 56       | 54            | 83       |
| Pain                                           | 6             | 22       | 22            | 34       |
| Scaling                                        | 4             | 15       | 8             | 12       |
| Redness                                        | 4             | 15       | 5             | 8        |
| Wounds                                         | 2             | 7        | 6             | 9        |
| Photosensitivity                               | 1             | 4        | 17            | 26       |
| Heat/alcohol/hash, friction                    | 2             | 7        | 4             | 6        |
| Scar tissue                                    | 0             | 0        | 2             | 3        |

\* One tattoo may show two or more symptoms.
